# Supplementary material
Source: Springer Nature journal article supplement (https://www.springermedizin.de/resource/supplementary/12985_2009_623_MOESM8_ESM.pdf/9608128)

**A****The Effect of Cathepsin B on HPV 16**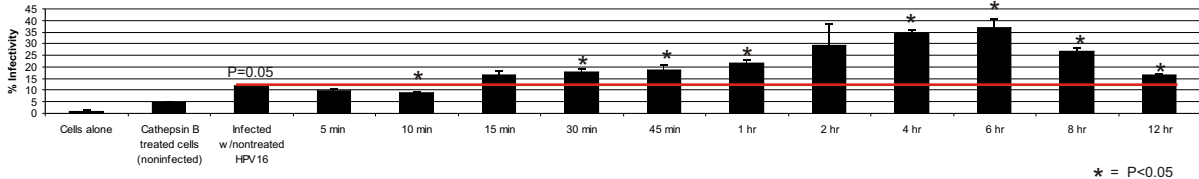**B****The Effect of Cathepsin L on HPV16**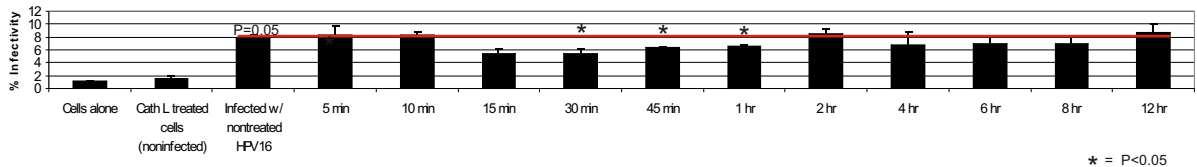

Supplement: MOESM8 [file 9608128]
